# Supplementary material for: The crystal growth and properties of novel magnetic double molybdate RbFe5(MoO4)7with mixed Fe3+/Fe2+states and 1D negative thermal expansion
Source: Royal Society of Chemistry journal article supplement (doi:10.1039/d1ce00118c), 2021-01-01
Supplement: d1ce00118c1.pdf [file d1ce00118c1.pdf]

## Supporting information

### Crystal growth and properties of double ferromagnetic molybdate

### **RbFe<sub>5</sub>(MoO<sub>4</sub>)<sub>7</sub> with mixed Fe<sup>3+</sup>/Fe<sup>2+</sup> states and 1D negative thermal expansion**

O.D. Chimitova<sup>1</sup>, B.G. Bazarov<sup>1</sup>, J.G. Bazarova<sup>1</sup>, V.V. Atuchin<sup>2,3</sup>, R. Azmi<sup>4</sup>, A.E. Sarapulova<sup>4</sup>,  
D. Mikhailova<sup>4,5</sup>, G. Balachandran<sup>4</sup>, A. Fiedler<sup>4</sup>, U. Geckle<sup>4</sup>, Yu. Prots<sup>6</sup>, A. C. Komarek<sup>6</sup>,  
T.A. Gavrilova<sup>7</sup>, I.P. Prosvirin<sup>8</sup>, Yi Yang<sup>9</sup>, Zheshuai Lin<sup>9</sup>, M. Knapp<sup>4</sup>, H. Ehrenberg<sup>4</sup>

<sup>1</sup>Baikal Institute of Nature Management, Siberian Branch, Russian Academy of Sciences, Ulan-Ude  
670047, Russia

<sup>2</sup>Laboratory of Optical Materials and Structures, Institute of Semiconductor Physics, SB RAS,  
Novosibirsk 630090, Russia

<sup>3</sup>Research and Development Department, Kemerovo State University, Kemerovo 650000, Russia

<sup>4</sup>Karlsruhe Institute of Technology (KIT), Institute for Applied Materials - Energy Storage Systems  
(IAM-ESS), Hermann-von-Helmholtz-Platz 1, D-76344 Eggenstein-Leopoldshafen, Germany

<sup>5</sup>IFW Dresden, Institute for Complex Materials, Helmholtzstrasse 20, 01069 Dresden, Germany

<sup>6</sup>Max Planck Institute for Chemical Physics of Solids, Nöthnitzer Str. 40, 01187 Dresden, Germany

<sup>7</sup>Laboratory of Nanodiagnostics and Nanolithography, Institute of Semiconductor Physics, SB RAS,  
Novosibirsk 630090, Russia

<sup>8</sup>Boreskov Institute of Catalysis, SB RAS, Novosibirsk 630090, Russia

<sup>9</sup>BCCRD, Key Laboratory of Functional Crystals and Laser Technology, Technical Institute of  
Physics and Chemistry, Chinese Academy of Sciences, Beijing 100190, China

**Table 1S.** Fractional atom coordinates of  $\text{RbFe}_5(\text{MoO}_4)_7$ 

| <b>Atom coordinates</b> |              |             |            |             |
|-------------------------|--------------|-------------|------------|-------------|
| <b>Atom</b>             | <b>Wyck.</b> | <b>x/a</b>  | <b>y/b</b> | <b>z/c</b>  |
| Rb1                     | 2e           | 0.49883(5)  | 3/4        | 0.96911(5)  |
| Mo4                     | 2e           | 0.41997(3)  | 1/4        | 0.57240(3)  |
| Mo1                     | 4f           | 0.01168(2)  | 0.14379(1) | 0.03149(2)  |
| Mo2                     | 4f           | 0.88272(2)  | 0.10740(1) | 0.45293(2)  |
| Mo3                     | 4f           | 0.52770(2)  | 0.95774(1) | 0.24650(2)  |
| Fe1                     | 2e           | 0.96089(5)  | 1/4        | 0.68982(4)  |
| Fe2                     | 4f           | 0.34900(4)  | 0.10029(1) | 0.34326(3)  |
| Fe3                     | 4f           | 0.02121(4)  | 0.99787(1) | 0.18544(3)  |
| O1                      | 4f           | 0.9602(2)   | 0.06087(6) | 0.99485(16) |
| O2                      | 4f           | 0.6365(2)   | 0.09869(8) | 0.34968(18) |
| O3                      | 4f           | 0.04984(19) | 0.08023(6) | 0.33011(16) |
| O4                      | 4f           | 0.0042(3)   | 0.18363(8) | 0.85356(19) |
| O5                      | 4f           | 0.32480(19) | 0.01593(6) | 0.22324(15) |
| O6                      | 4f           | 0.2594(2)   | 0.14961(7) | 0.14492(17) |
| O7                      | 2e           | 0.2605(3)   | 1/4        | 0.7061(2)   |
| O8                      | 4f           | 0.7312(2)   | 0.98412(8) | 0.17033(18) |
| O9                      | 4f           | 0.1502(2)   | 0.67756(8) | 0.8691(2)   |
| O10                     | 2e           | 0.6669(3)   | 1/4        | 0.6801(3)   |
| O11                     | 4f           | 0.6115(2)   | 0.94257(8) | 0.44877(17) |
| O12                     | 4f           | 0.9160(2)   | 0.06075(7) | 0.62051(18) |
| O13                     | 4f           | 0.4417(3)   | 0.8893(8)  | 0.1567(2)   |
| O14                     | 4f           | 0.9298(2)   | 0.18474(7) | 0.51492(17) |
| O15                     | 4f           | 0.3738(3)   | 0.31726(8) | 0.4542(2)   |

**Table 2S.** Anisotropic displacement parameters ( $\text{\AA}^2$ ) of  $\text{RbFe}_5(\text{MoO}_4)_7$

| Anisotropic displacement parameters, in Å <sup>2</sup> |                 |                 |                 |                 |                 |                 |
|--------------------------------------------------------|-----------------|-----------------|-----------------|-----------------|-----------------|-----------------|
| Atom                                                   | U <sub>11</sub> | U <sub>22</sub> | U <sub>33</sub> | U <sub>12</sub> | U <sub>13</sub> | U <sub>23</sub> |
| Rb1                                                    | 0.01702(14)     | 0.03348(18)     | 0.03573(19)     | 0.00000         | 0.00135(13)     | 0.00000         |
| Mo4                                                    | 0.00813(8)      | 0.00884(9)      | 0.00924(9)      | 0.00000         | 0.00215(7)      | 0.00000         |
| Mo1                                                    | 0.01226(7)      | 0.00585(6)      | 0.01003(6)      | 0.00039(5)      | -0.00006(5)     | 0.00103(5)      |
| Mo2                                                    | 0.00603(6)      | 0.00787(6)      | 0.00933(6)      | -0.00028(5)     | 0.00247(5)      | -0.00214(5)     |
| Mo3                                                    | 0.00643(6)      | 0.01066(6)      | 0.00873(6)      | 0.00126(5)      | 0.00159(5)      | 0.00075(5)      |
| Fe1                                                    | 0.00714(14)     | 0.00709(14)     | 0.00629(14)     | 0.00000         | 0.00067(11)     | 0.00000         |
| Fe2                                                    | 0.00621(10)     | 0.00936(11)     | 0.0084(1)       | -0.00039(8)     | 0.00059(8)      | -0.00024(8)     |
| Fe3                                                    | 0.00774(10)     | 0.00806(10)     | 0.00757(10)     | -0.00043(8)     | 0.00184(8)      | -0.00077(8)     |
| O1                                                     | 0.0124(6)       | 0.0088(6)       | 0.0125(6)       | -0.0007(4)      | 0.0017(5)       | -0.0006(5)      |
| O2                                                     | 0.0079(6)       | 0.0279(8)       | 0.0197(7)       | -0.0018(5)      | 0.0029(5)       | -0.0053(6)      |
| O3                                                     | 0.0088(5)       | 0.0128(6)       | 0.0147(6)       | 0.0014(5)       | 0.0032(5)       | -0.0020(5)      |
| O4                                                     | 0.0306(9)       | 0.0193(7)       | 0.0185(7)       | -0.0029(6)      | -0.0020(6)      | 0.0098(6)       |
| O5                                                     | 0.0080(5)       | 0.0111(6)       | 0.0118(6)       | 0.0008(4)       | 0.0019(4)       | -0.0010(5)      |
| O6                                                     | 0.0152(6)       | 0.0165(7)       | 0.0134(6)       | -0.0045(5)      | 0.0001(5)       | 0.0031(5)       |
| O7                                                     | 0.0102(8)       | 0.0249(11)      | 0.0152(9)       | 0.00000         | 0.0040(7)       | 0.00000         |
| O8                                                     | 0.0118(6)       | 0.0272(8)       | 0.0208(7)       | 0.0021(6)       | 0.0078(5)       | 0.0041(6)       |
| O9                                                     | 0.0223(8)       | 0.0208(8)       | 0.0287(8)       | -0.0093(6)      | 0.0046(6)       | 0.0062(6)       |
| O10                                                    | 0.0109(9)       | 0.0263(11)      | 0.0207(10)      | 0.00000         | 0.0026(8)       | 0.00000         |
| O11                                                    | 0.0194(7)       | 0.0290(8)       | 0.0121(6)       | 0.0050(6)       | 0.0016(5)       | 0.0076(6)       |
| O12                                                    | 0.0224(7)       | 0.0173(7)       | 0.0184(7)       | 0.0001(6)       | 0.0061(6)       | 0.0048(6)       |
| O13                                                    | 0.0231(8)       | 0.0181(7)       | 0.0338(9)       | 0.0005(6)       | -0.0002(7)      | -0.0085(7)      |
| O14                                                    | 0.0221(7)       | 0.0110(6)       | 0.0140(6)       | -0.0025(5)      | 0.0050(5)       | -0.0033(5)      |
| O15                                                    | 0.0285(8)       | 0.0203(8)       | 0.0233(8)       | 0.0000(6)       | 0.0035(7)       | 0.0105(6)       |

**Table 3S.** Main bond lengths (Å) and angles in RbFe<sub>5</sub>(MoO<sub>4</sub>)<sub>7</sub>

|                                        |
|----------------------------------------|
| <b>Selected geometric informations</b> |
|----------------------------------------|

| <b>Atoms 1,2</b>                        | <b>d 1,2 [Å]</b>       | <b>Atoms 1,2</b>                         | <b>d 1,2 [Å]</b>       |
|-----------------------------------------|------------------------|------------------------------------------|------------------------|
| Rb1—O9                                  | 2.8347(16)             | Fe1—O4                                   | 1.9820(15)             |
| Rb1—O9 <sup>i</sup>                     | 2.8347(16)             | Fe1—O10 <sup>xi</sup>                    | 2.012(2)               |
| Rb1—O7 <sup>ii</sup>                    | 2.955(2)               | Fe1—O14                                  | 2.0361(14)             |
| Rb1—O6 <sup>iii</sup>                   | 3.0045(14)             | Fe1—O14 <sup>vii</sup>                   | 2.0361(14)             |
| Rb1—O6 <sup>iv</sup>                    | 3.0045(14)             | Fe1—O7                                   | 2.041(2)               |
| Rb1—O13                                 | 3.4461(17)             | Fe2—O2                                   | 1.9726(14)             |
| Rb1—O13 <sup>i</sup>                    | 3.4461(17)             | Fe2—O11 <sup>xii</sup>                   | 1.9901(15)             |
| Rb1—O10 <sup>ii</sup>                   | 3.472(2)               | Fe2—O15 <sup>xiii</sup>                  | 1.9924(16)             |
| Rb1—Mo4 <sup>ii</sup>                   | 3.9016(5)              | Fe2—O6                                   | 2.0003(14)             |
| Rb1—Mo1 <sup>v</sup>                    | 4.0650(4)              | Fe2—O5                                   | 2.0656(14)             |
| Rb1—Mo1 <sup>vi</sup>                   | 4.0650(4)              | Fe2—O3 <sup>xi</sup>                     | 2.0869(13)             |
| Rb1—Mo1 <sup>iii</sup>                  | 4.1844(4)              | Fe3—O8                                   | 1.9984(15)             |
| Mo4—O15 <sup>vii</sup>                  | 1.7513(16)             | Fe3—O1 <sup>v</sup>                      | 2.0288(14)             |
| Mo4—O15                                 | 1.7513(16)             | Fe3—O12 <sup>ii</sup>                    | 2.0680(15)             |
| Mo4—O7                                  | 1.760(2)               | Fe3—O5 <sup>x</sup>                      | 2.0861(13)             |
| Mo4—O10                                 | 1.762(2)               | Fe3—O1                                   | 2.1026(14)             |
| Mo4—Rb1 <sup>ii</sup>                   | 3.9016(5)              | Fe3—O3                                   | 2.1419(14)             |
| Mo1—O9 <sup>viii</sup>                  | 1.7074(16)             | O1—Fe3 <sup>v</sup>                      | 2.0288(14)             |
| Mo1—O4 <sup>ix</sup>                    | 1.7537(16)             | O3—Fe2 <sup>x</sup>                      | 2.0869(13)             |
| Mo1—O6 <sup>x</sup>                     | 1.7878(14)             | O4—Mo1 <sup>xiv</sup>                    | 1.7537(16)             |
| Mo1—O1                                  | 1.8157(13)             | O5—Fe3 <sup>xi</sup>                     | 2.0861(13)             |
| Mo1—Rb1 <sup>v</sup>                    | 4.0650(4)              | O6—Mo1 <sup>xi</sup>                     | 1.7878(14)             |
| Mo1—Rb1 <sup>iii</sup>                  | 4.1844(4)              | O6—Rb1 <sup>iii</sup>                    | 3.0045(14)             |
| Mo2—O12                                 | 1.7364(15)             | O7—Rb1 <sup>ii</sup>                     | 2.955(2)               |
| Mo2—O14                                 | 1.7415(14)             | O9—Mo1 <sup>iv</sup>                     | 1.7074(16)             |
| Mo2—O2                                  | 1.7552(14)             | O10—Fe1 <sup>x</sup>                     | 2.012(2)               |
| Mo2—O3                                  | 1.8222(13)             | O10—Rb1 <sup>ii</sup>                    | 3.472(2)               |
| Mo3—O13                                 | 1.6995(17)             | O11—Fe2 <sup>xii</sup>                   | 1.9901(15)             |
| Mo3—O11                                 | 1.7591(15)             | O12—Fe3 <sup>ii</sup>                    | 2.0680(15)             |
| Mo3—O8                                  | 1.7654(15)             | O15—Fe2 <sup>xv</sup>                    | 1.9924(16)             |
| Mo3—O5                                  | 1.8482(13)             | Fe2—O15 <sup>vii</sup>                   | 1.9923(17)             |
| Fe1—O4 <sup>vii</sup>                   | 1.9820(16)             | Mo1—Fe2                                  | 3.3078(3)              |
| <b>Atoms 1,2,3</b>                      | <b>Angle 1,2,3 [°]</b> | <b>Atoms 1,2,3</b>                       | <b>Angle 1,2,3 [°]</b> |
| O9—Rb1—O9 <sup>i</sup>                  | 65.93(7)               | O6 <sup>x</sup> —Mo1—Rb1 <sup>iii</sup>  | 132.05(5)              |
| O9—Rb1—O7 <sup>ii</sup>                 | 124.17(5)              | O1—Mo1—Rb1 <sup>iii</sup>                | 113.07(4)              |
| O9 <sup>i</sup> —Rb1—O7 <sup>ii</sup>   | 124.17(5)              | Rb1 <sup>v</sup> —Mo1—Rb1 <sup>iii</sup> | 113.488(5)             |
| O9—Rb1—O6 <sup>iii</sup>                | 141.28(5)              | O12—Mo2—O14                              | 107.38(7)              |
| O9 <sup>i</sup> —Rb1—O6 <sup>iii</sup>  | 90.35(5)               | O12—Mo2—O2                               | 108.06(8)              |
| O7 <sup>ii</sup> —Rb1—O6 <sup>iii</sup> | 94.32(4)               | O14—Mo2—O2                               | 110.80(7)              |
| O9—Rb1—O6 <sup>iv</sup>                 | 90.35(5)               | O12—Mo2—O3                               | 108.71(7)              |
| O9 <sup>i</sup> —Rb1—O6 <sup>iv</sup>   | 141.28(5)              | O14—Mo2—O3                               | 112.41(7)              |
| O7 <sup>ii</sup> —Rb1—O6 <sup>iv</sup>  | 94.32(4)               | O2—Mo2—O3                                | 109.34(7)              |
| O6 <sup>iii</sup> —Rb1—O6 <sup>iv</sup> | 90.70(6)               | O13—Mo3—O11                              | 108.06(9)              |
| O9—Rb1—O13                              | 116.02(5)              | O13—Mo3—O8                               | 109.20(9)              |
| O9 <sup>i</sup> —Rb1—O13                | 60.14(4)               | O11—Mo3—O8                               | 108.23(7)              |
| O7 <sup>ii</sup> —Rb1—O13               | 69.29(3)               | O13—Mo3—O5                               | 109.98(7)              |

|                                           |           |                                             |           |
|-------------------------------------------|-----------|---------------------------------------------|-----------|
| O6 <sup>iii</sup> —Rb1—O13                | 70.75(4)  | O11—Mo3—O5                                  | 108.29(7) |
| O6 <sup>iv</sup> —Rb1—O13                 | 153.49(4) | O8—Mo3—O5                                   | 112.94(7) |
| O9—Rb1—O13 <sup>i</sup>                   | 60.14(4)  | O4 <sup>vii</sup> —Fe1—O4                   | 90.96(10) |
| O9 <sup>i</sup> —Rb1—O13 <sup>i</sup>     | 116.02(5) | O4 <sup>vii</sup> —Fe1—O10 <sup>xi</sup>    | 91.59(7)  |
| O7 <sup>ii</sup> —Rb1—O13 <sup>i</sup>    | 69.29(3)  | O4—Fe1—O10 <sup>xi</sup>                    | 91.59(7)  |
| O6 <sup>iii</sup> —Rb1—O13 <sup>i</sup>   | 153.49(4) | O4 <sup>vii</sup> —Fe1—O14                  | 176.22(7) |
| O6 <sup>iv</sup> —Rb1—O13 <sup>i</sup>    | 70.75(4)  | O4—Fe1—O14                                  | 91.42(7)  |
| O13—Rb1—O13 <sup>i</sup>                  | 118.78(7) | O10 <sup>xi</sup> —Fe1—O14                  | 91.28(7)  |
| O9—Rb1—O10 <sup>ii</sup>                  | 81.57(5)  | O4 <sup>vii</sup> —Fe1—O14 <sup>vii</sup>   | 91.42(7)  |
| O9 <sup>i</sup> —Rb1—O10 <sup>ii</sup>    | 81.57(5)  | O4—Fe1—O14 <sup>vii</sup>                   | 176.22(7) |
| O7 <sup>ii</sup> —Rb1—O10 <sup>ii</sup>   | 52.09(5)  | O10 <sup>xi</sup> —Fe1—O14 <sup>vii</sup>   | 91.28(6)  |
| O6 <sup>iii</sup> —Rb1—O10 <sup>ii</sup>  | 126.70(3) | O14—Fe1—O14 <sup>vii</sup>                  | 86.07(8)  |
| O6 <sup>iv</sup> —Rb1—O10 <sup>ii</sup>   | 126.70(3) | O4 <sup>vii</sup> —Fe1—O7                   | 87.33(7)  |
| O13—Rb1—O10 <sup>ii</sup>                 | 59.58(3)  | O4—Fe1—O7                                   | 87.33(7)  |
| O13 <sup>i</sup> —Rb1—O10 <sup>ii</sup>   | 59.58(3)  | O10 <sup>xi</sup> —Fe1—O7                   | 178.45(9) |
| O9—Rb1—Mo4 <sup>ii</sup>                  | 104.02(4) | O14—Fe1—O7                                  | 89.85(6)  |
| O9 <sup>i</sup> —Rb1—Mo4 <sup>ii</sup>    | 104.02(4) | O14 <sup>vii</sup> —Fe1—O7                  | 89.85(6)  |
| O7 <sup>ii</sup> —Rb1—Mo4 <sup>ii</sup>   | 25.25(4)  | O2—Fe2—O11 <sup>xii</sup>                   | 91.27(7)  |
| O6 <sup>iii</sup> —Rb1—Mo4 <sup>ii</sup>  | 111.48(3) | O2—Fe2—O15 <sup>xiii</sup>                  | 91.05(7)  |
| O6 <sup>iv</sup> —Rb1—Mo4 <sup>ii</sup>   | 111.48(3) | O11 <sup>xii</sup> —Fe2—O15 <sup>xiii</sup> | 89.08(7)  |
| O13—Rb1—Mo4 <sup>ii</sup>                 | 61.57(3)  | O2—Fe2—O6                                   | 99.17(6)  |
| O13 <sup>i</sup> —Rb1—Mo4 <sup>ii</sup>   | 61.57(3)  | O11 <sup>xii</sup> —Fe2—O6                  | 168.60(7) |
| O10 <sup>ii</sup> —Rb1—Mo4 <sup>ii</sup>  | 26.85(4)  | O15 <sup>xiii</sup> —Fe2—O6                 | 86.17(7)  |
| O9—Rb1—Mo1 <sup>v</sup>                   | 162.49(4) | O2—Fe2—O5                                   | 88.45(6)  |
| O9 <sup>i</sup> —Rb1—Mo1 <sup>v</sup>     | 110.38(4) | O11 <sup>xii</sup> —Fe2—O5                  | 92.30(6)  |
| O7 <sup>ii</sup> —Rb1—Mo1 <sup>v</sup>    | 72.64(3)  | O15 <sup>xiii</sup> —Fe2—O5                 | 178.54(7) |
| O6 <sup>iii</sup> —Rb1—Mo1 <sup>v</sup>   | 23.77(3)  | O6—Fe2—O5                                   | 92.56(6)  |
| O6 <sup>iv</sup> —Rb1—Mo1 <sup>v</sup>    | 82.89(3)  | O2—Fe2—O3 <sup>xi</sup>                     | 167.11(6) |
| O13—Rb1—Mo1 <sup>v</sup>                  | 72.53(3)  | O11 <sup>xii</sup> —Fe2—O3 <sup>xi</sup>    | 84.27(6)  |
| O13 <sup>i</sup> —Rb1—Mo1 <sup>v</sup>    | 131.10(3) | O15 <sup>xiii</sup> —Fe2—O3 <sup>xi</sup>   | 100.94(6) |
| O10 <sup>ii</sup> —Rb1—Mo1 <sup>v</sup>   | 115.38(3) | O6—Fe2—O3 <sup>xi</sup>                     | 86.46(6)  |
| Mo4 <sup>ii</sup> —Rb1—Mo1 <sup>v</sup>   | 93.497(8) | O5—Fe2—O3 <sup>xi</sup>                     | 79.68(5)  |
| O9—Rb1—Mo1 <sup>vi</sup>                  | 110.38(4) | O8—Fe3—O1 <sup>v</sup>                      | 94.85(6)  |
| O9 <sup>i</sup> —Rb1—Mo1 <sup>vi</sup>    | 162.49(4) | O8—Fe3—O12 <sup>ii</sup>                    | 89.98(6)  |
| O7 <sup>ii</sup> —Rb1—Mo1 <sup>vi</sup>   | 72.64(3)  | O1 <sup>v</sup> —Fe3—O12 <sup>ii</sup>      | 102.72(6) |
| O6 <sup>iii</sup> —Rb1—Mo1 <sup>vi</sup>  | 82.89(3)  | O8—Fe3—O5 <sup>x</sup>                      | 174.34(6) |
| O6 <sup>iv</sup> —Rb1—Mo1 <sup>vi</sup>   | 23.77(3)  | O1 <sup>v</sup> —Fe3—O5 <sup>x</sup>        | 90.58(5)  |
| O13—Rb1—Mo1 <sup>vi</sup>                 | 131.10(3) | O12 <sup>ii</sup> —Fe3—O5 <sup>x</sup>      | 87.28(6)  |
| O13 <sup>i</sup> —Rb1—Mo1 <sup>vi</sup>   | 72.53(3)  | O8—Fe3—O1                                   | 90.61(6)  |
| O10 <sup>ii</sup> —Rb1—Mo1 <sup>vi</sup>  | 115.38(3) | O1 <sup>v</sup> —Fe3—O1                     | 79.67(6)  |
| Mo4 <sup>ii</sup> —Rb1—Mo1 <sup>vi</sup>  | 93.497(8) | O12 <sup>ii</sup> —Fe3—O1                   | 177.48(6) |
| Mo1 <sup>v</sup> —Rb1—Mo1 <sup>vi</sup>   | 67.600(8) | O5 <sup>x</sup> —Fe3—O1                     | 91.93(5)  |
| O9—Rb1—Mo1 <sup>iii</sup>                 | 68.54(4)  | O8—Fe3—O3                                   | 97.21(6)  |
| O9 <sup>i</sup> —Rb1—Mo1 <sup>iii</sup>   | 17.46(4)  | O1 <sup>v</sup> —Fe3—O3                     | 160.78(5) |
| O7 <sup>ii</sup> —Rb1—Mo1 <sup>iii</sup>  | 107.72(3) | O12 <sup>ii</sup> —Fe3—O3                   | 92.22(6)  |
| O6 <sup>iii</sup> —Rb1—Mo1 <sup>iii</sup> | 98.09(3)  | O5 <sup>x</sup> —Fe3—O3                     | 77.97(5)  |
| O6 <sup>iv</sup> —Rb1—Mo1 <sup>iii</sup>  | 155.45(3) | O1—Fe3—O3                                   | 85.27(5)  |
| O13—Rb1—Mo1 <sup>iii</sup>                | 49.85(3)  | Mo1—O1—Fe3 <sup>v</sup>                     | 133.85(8) |
| O13 <sup>i</sup> —Rb1—Mo1 <sup>iii</sup>  | 106.59(3) | Mo1—O1—Fe3                                  | 118.89(7) |

|                                                                                                                                                                                                                                                                                                                       |            |                                          |            |
|-----------------------------------------------------------------------------------------------------------------------------------------------------------------------------------------------------------------------------------------------------------------------------------------------------------------------|------------|------------------------------------------|------------|
| O10 <sup>ii</sup> —Rb1—Mo1 <sup>iii</sup>                                                                                                                                                                                                                                                                             | 64.41(3)   | Fe3 <sup>v</sup> —O1—Fe3                 | 100.33(6)  |
| Mo4 <sup>ii</sup> —Rb1—Mo1 <sup>iii</sup>                                                                                                                                                                                                                                                                             | 86.602(8)  | Mo2—O2—Fe2                               | 150.63(9)  |
| Mo1 <sup>v</sup> —Rb1—Mo1 <sup>iii</sup>                                                                                                                                                                                                                                                                              | 113.488(5) | Mo2—O3—Fe2 <sup>x</sup>                  | 130.06(7)  |
| Mo1 <sup>vi</sup> —Rb1—Mo1 <sup>iii</sup>                                                                                                                                                                                                                                                                             | 178.903(6) | Mo2—O3—Fe3                               | 127.72(7)  |
| O15 <sup>vii</sup> —Mo4—O15                                                                                                                                                                                                                                                                                           | 109.70(12) | Fe2 <sup>x</sup> —O3—Fe3                 | 99.63(5)   |
| O15 <sup>vii</sup> —Mo4—O7                                                                                                                                                                                                                                                                                            | 108.96(7)  | Mo1 <sup>xiv</sup> —O4—Fe1               | 161.59(11) |
| O15—Mo4—O7                                                                                                                                                                                                                                                                                                            | 108.96(7)  | Mo3—O5—Fe2                               | 123.31(7)  |
| O15 <sup>vii</sup> —Mo4—O10                                                                                                                                                                                                                                                                                           | 110.30(7)  | Mo3—O5—Fe3 <sup>xi</sup>                 | 127.28(7)  |
| O15—Mo4—O10                                                                                                                                                                                                                                                                                                           | 110.30(7)  | Fe2—O5—Fe3 <sup>xi</sup>                 | 102.19(6)  |
| O7—Mo4—O10                                                                                                                                                                                                                                                                                                            | 108.59(10) | Mo1 <sup>xi</sup> —O6—Fe2                | 121.57(8)  |
| O15 <sup>vii</sup> —Mo4—Rb1 <sup>ii</sup>                                                                                                                                                                                                                                                                             | 124.55(6)  | Mo1 <sup>xi</sup> —O6—Rb1 <sup>iii</sup> | 113.60(6)  |
| O15—Mo4—Rb1 <sup>ii</sup>                                                                                                                                                                                                                                                                                             | 124.55(6)  | Fe2—O6—Rb1 <sup>iii</sup>                | 124.42(6)  |
| O7—Mo4—Rb1 <sup>ii</sup>                                                                                                                                                                                                                                                                                              | 45.73(7)   | Mo4—O7—Fe1                               | 135.96(12) |
| O10—Mo4—Rb1 <sup>ii</sup>                                                                                                                                                                                                                                                                                             | 62.86(7)   | Mo4—O7—Rb1 <sup>ii</sup>                 | 109.02(9)  |
| O9 <sup>viii</sup> —Mo1—O4 <sup>ix</sup>                                                                                                                                                                                                                                                                              | 109.92(9)  | Fe1—O7—Rb1 <sup>ii</sup>                 | 115.01(8)  |
| O9 <sup>viii</sup> —Mo1—O6 <sup>x</sup>                                                                                                                                                                                                                                                                               | 110.10(8)  | Mo3—O8—Fe3                               | 152.41(9)  |
| O4 <sup>ix</sup> —Mo1—O6 <sup>x</sup>                                                                                                                                                                                                                                                                                 | 107.39(7)  | Mo1 <sup>iv</sup> —O9—Rb1                | 132.65(9)  |
| O9 <sup>viii</sup> —Mo1—O1                                                                                                                                                                                                                                                                                            | 111.92(8)  | Mo4—O10—Fe1 <sup>x</sup>                 | 151.08(13) |
| O4 <sup>ix</sup> —Mo1—O1                                                                                                                                                                                                                                                                                              | 110.34(7)  | Mo4—O10—Rb1 <sup>ii</sup>                | 90.30(8)   |
| O6 <sup>x</sup> —Mo1—O1                                                                                                                                                                                                                                                                                               | 107.03(6)  | Fe1 <sup>x</sup> —O10—Rb1 <sup>ii</sup>  | 118.63(9)  |
| O9 <sup>viii</sup> —Mo1—Rb1 <sup>v</sup>                                                                                                                                                                                                                                                                              | 113.49(6)  | Mo3—O11—Fe2 <sup>xii</sup>               | 160.63(11) |
| O4 <sup>ix</sup> —Mo1—Rb1 <sup>v</sup>                                                                                                                                                                                                                                                                                | 66.41(6)   | Mo2—O12—Fe3 <sup>ii</sup>                | 174.79(10) |
| O6 <sup>x</sup> —Mo1—Rb1 <sup>v</sup>                                                                                                                                                                                                                                                                                 | 42.63(5)   | Mo3—O13—Rb1                              | 153.02(9)  |
| O1—Mo1—Rb1 <sup>v</sup>                                                                                                                                                                                                                                                                                               | 132.26(4)  | Mo2—O14—Fe1                              | 149.22(9)  |
| O9 <sup>viii</sup> —Mo1—Rb1 <sup>iii</sup>                                                                                                                                                                                                                                                                            | 29.88(6)   | Mo4—O15—Fe2 <sup>xv</sup>                | 171.97(11) |
| O4 <sup>ix</sup> —Mo1—Rb1 <sup>iii</sup>                                                                                                                                                                                                                                                                              | 82.48(6)   |                                          |            |
| <p>(i) x, -1/2-y, z; (ii) 2-x, -y, 1-z; (iii) 1-x, -y, -z; (iv) 1-x, -1/2+y, -z;<br/> (v) 2-x, -y, -z; (vi) 2-x, -1/2+y, -z; (vii) x, 1/2-y, z; (viii) 1-x, 1/2+y, -z;<br/> (ix) x, y, -1+z; (x) 1+x, y, z; (xi) -1+x, y, z; (xii) 1-x, -y, 1-z;<br/> (xiii) -1+x, 1/2-y, z; (xiv) x, y, 1+z; (xv) 1+x, 1/2-y, z.</p> |            |                                          |            |

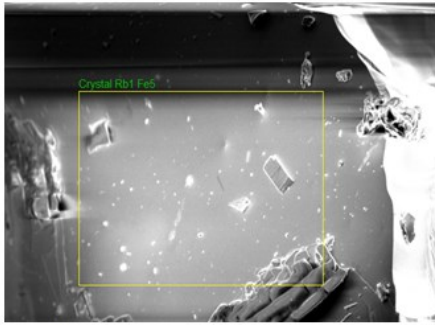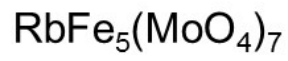

| Element | OZ | Serie   | [At. %] |
|---------|----|---------|---------|
| C       | 6  | K-Serie | 6,57    |
| O       | 8  | K-Serie | 72,36   |
| Na      | 11 | K-Serie | 0,39    |
| Fe      | 26 | L-Serie | 11,50   |
| Rb      | 37 | L-Serie | 1,81    |
| Mo      | 42 | L-Serie | 7,36    |

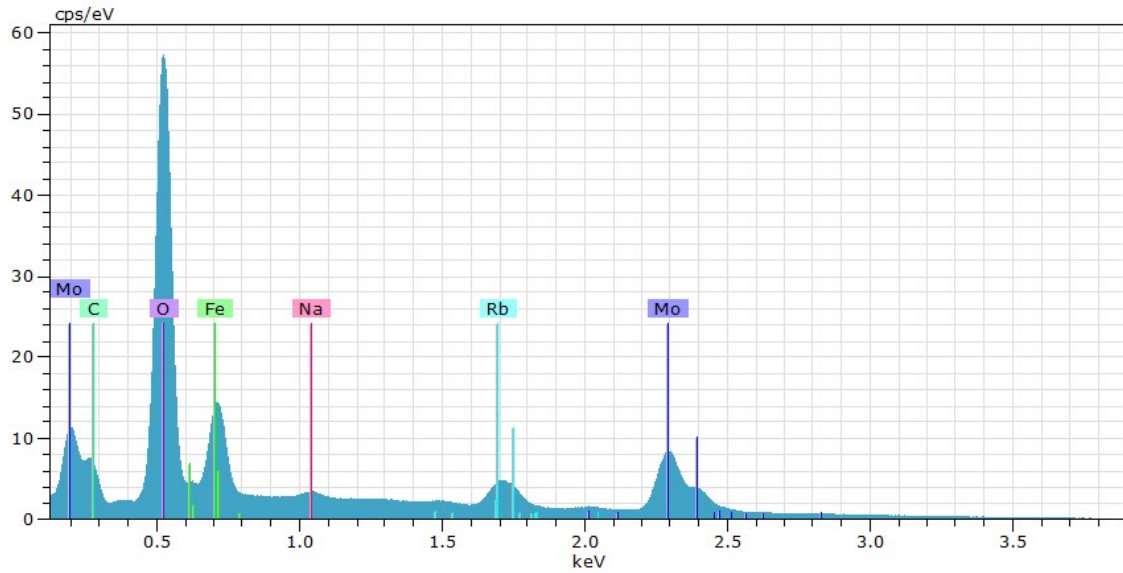

**Figure 1S.** EDS analysis of selected  $\text{RbFe}_5(\text{MoO}_4)_7$  single crystal.

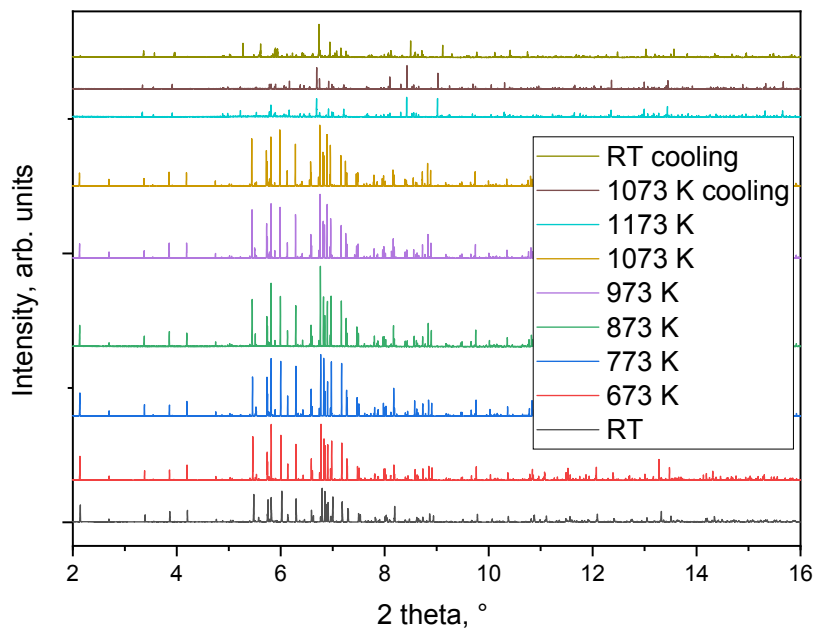

**Figure 2S.** Synchrotron diffraction patterns recorded from the  $\text{RbFe}_5(\text{MoO}_4)_7$  powder sample at the different temperatures ( $\lambda=0.40073 \text{ \AA}$ , Grenoble, France).
